# Supplementary material for: Chiroptical switch based on azobenzene-substituted polydiacetylene LB films under thermal and photic stimuli
Source: Royal Society of Chemistry journal article supplement (doi:10.1039/b913764e), 2009-11-09
Supplement: b913764e.pdf [file b913764e.pdf]

## Supplementary data

### Chiroptical Switch Based on Azobenzene-Substituted Polydiacetylene LB Films under Thermal and Photic Stimuli

Gang Zou<sup>a\*</sup>, Hao Jiang<sup>a</sup>, Qijin Zhang<sup>a</sup>, Hideki Kon<sup>b</sup>, Takaaki Manaka<sup>b</sup>, and Mitsumasa Iwamoto<sup>b</sup>

<sup>a</sup> CAS Key Laboratory of Soft Matter Chemistry, Department of Polymer Science and Engineering, Key Laboratory of Optoelectronic Science and Technology in Anhui Province, University of Science and Technology of China, Hefei, Anhui 230026, P. R. China.

<sup>b</sup>Department of Physical Electronics, Tokyo Institute of Technology, 2-12-1 O-okayama, Meguro-ku, Tokyo 152-8552, Japan

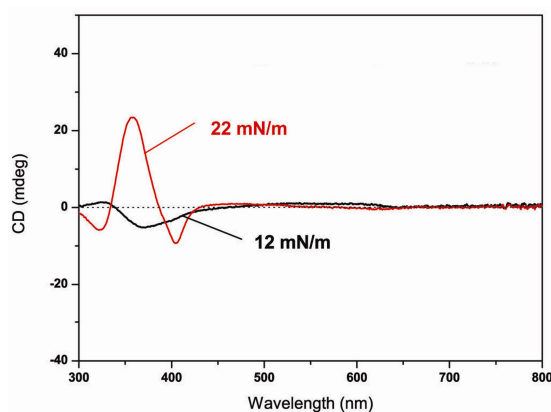

**Figure S1.** CD spectra of NADA LB films deposited at 12 mN/m and 22 mN/m.

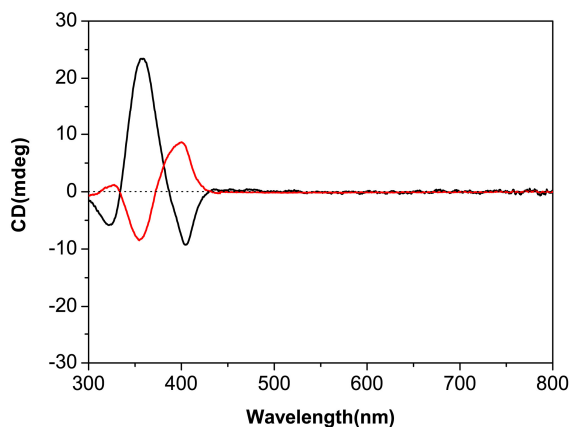

**Figure S2.** CD spectra of NADA LB films deposited at 22 mN/m in different batches. The substrates are fused silica.

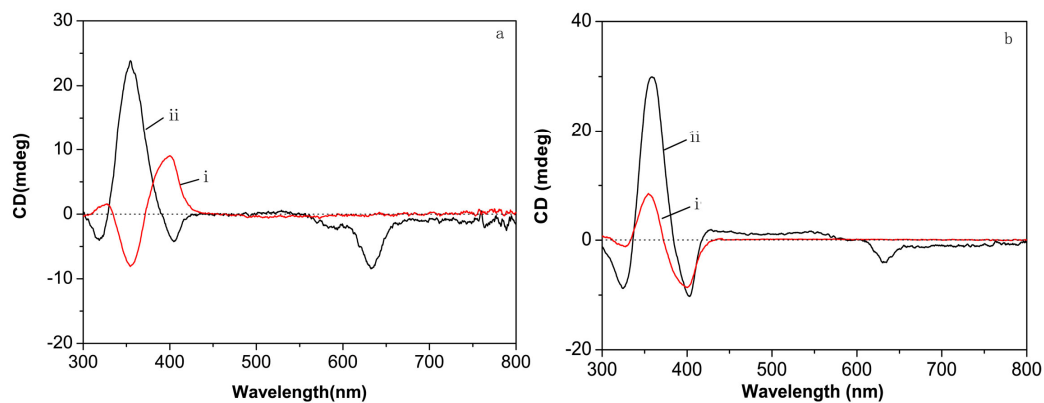

**Figure S3.** CD spectra of (i) NADA LB films deposited at 22 mN/m in different batches with opposite CD signals and (ii) PNADA LB films polymerized by left-handed CPUL.

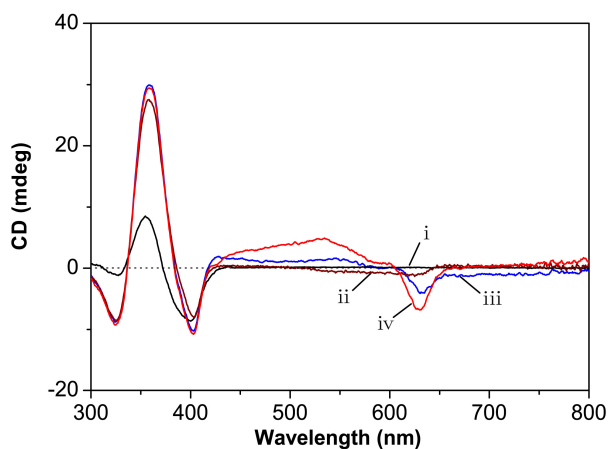

**Figure S4.** CD spectra of PNADA LB film polymerized by left-handed CPUL for 0 (i), 5 (ii), 20 (iii) and 35 min (iv).
